# Supplementary material for: Comprehensive profiling of Epstein-Barr virus-encoded miRNA species associated with specific latency types in tumor cells
Source: PubMed Central journal article supplement (PMC4231337; doi:10.1186/1743-422x-10-314), 2013-10-26
Supplement: 1743-422X-10-314-S1.pdf [file 1743-422X-10-314-S1.pdf]

**Supplementary Table 1 The PCR primers sequences for viral latent genes**

| Primer Name          | Sequence                |
|----------------------|-------------------------|
| Cp forward primer    | CATCTAAACCGACTGAAGAA    |
| Cp reverse primer    | CCCTGAAGGTGAACCGCTTA    |
| Qp forward primer    | TAGCGTGCGCTACCGG        |
| Qp reverse primer    | CATTTCCAGGTCCTGTACCT    |
| Wp forward primer    | GTCCACACAAATCCTAG       |
| Wp reverse primer    | CCCTGAAGGTGAACCGCTTA    |
| GAPDH forward primer | CTCCTCCTGTTTCGACAGTCAGC |
| GAPDH reverse primer | CCAATACGACCAAATCCGTT    |

Note: The PCR primers refer to J Biol Chem. 2010 Oct 22;285(43):33358-70.

**Supplementary Table 2 The PCR primer and microarray probe sequences for EBV miRNA species**

| ebv-miR  | Oligo           | Sequence                  |
|----------|-----------------|---------------------------|
| BHRF1-1  | Location        | 41474-41495               |
|          | Mature Sequence | UAACCUGAUCAGCCCCGGAGUU    |
|          | Primer Sequence | TAACCTGATCAGCCCCGGAGTTAA  |
|          | Probe Sequence  | GAACTCCGGGGCTGATCAGGTTA   |
| BHRF1-2* | Location        | 42853-42874               |
|          | Mature Sequence | AAAUUCUGUUGCAGCAGAUAGC    |
|          | Primer Sequence | AAATTCTGTTGCAGCAGATAGCAA  |
|          | Probe Sequence  | GGCTATCTGCTGCAACAGAATTT   |
| BHRF 1-2 | Location        | 42888-42909               |
|          | Mature Sequence | UAUCUUUUGCGGCAGAAAUUGA    |
|          | Primer Sequence | TATCTTTTGCAGCAGAAATTGAAA  |
|          | Probe Sequence  | GTCAATTTCTGCCGCAAAGATA    |
| BHRF 1-3 | Location        | 42968-42989               |
|          | Mature Sequence | UAACGGGAAGUGUGUAAGCACA    |
|          | Primer Sequence | TAACGGGAAGTGTGTAAGCACAAA  |
|          | Probe Sequence  | GTGTGCTTACACACTTCCCGTTA   |
| BART 3*  | Location        | 139087-139107             |
|          | Mature Sequence | ACCUAGUGUUAGUGUUGUGCU     |
|          | Primer Sequence | ACCTAGTGTTAGTGTGTTGTGCTAA |
|          | Probe Sequence  | GAGCACAACACTAACACTAGGT    |
| BART 3   | Location        | 139125-139145             |
|          | Mature Sequence | CGCACCACUAGUCACCAGGUGU    |
|          | Primer Sequence | CGCACCAGTGTGTTAGTGTGCTAA  |
|          | Probe Sequence  | GACACCTGGTGACTAGTGGTGCG   |

|            |                 |                            |
|------------|-----------------|----------------------------|
| BART 4     | Location        | 139228-139249              |
|            | Mature Sequence | GACCUGAUGCUGCUGGUGUGCU     |
|            | Primer Sequence | GACCTGATGCTGCTGGTGTGCTAA   |
|            | Probe Sequence  | GAGCACACCAGCAGCATCAGGTC    |
| BART 4*    | Location        | 139266-139288              |
|            | Mature Sequence | CACAUCACGUAGGCACCAGGUGU    |
|            | Primer Sequence | CACATCACGTAGGCACCAGGTGTAA  |
|            | Probe Sequence  | GACACCTGGTGCCTACGTGATGTG   |
| BART 1-5p  | Location        | 139351-139374              |
|            | Mature Sequence | UCUUAGUGGAAGUGACGUGCUGUG   |
|            | Primer Sequence | TCTTAGTGGAAGTGACGTGCTGTGAA |
|            | Probe Sequence  | GCCTGGACCTTGACTATGAAACA    |
| BART 1-3p  | Location        | 139387-139408              |
|            | Mature Sequence | UAGCACCGCUAUCCACUAUGUC     |
|            | Primer Sequence | TAGCACCGCTATCCACTATGTCAA   |
|            | Probe Sequence  | GGACATAGTGGATAGCGGTGCTA    |
| BART 15    | Location        | 139553-139574              |
|            | Mature Sequence | GUCAGUGGUUUUGUUUCCUUGA     |
|            | Primer Sequence | GTCAGTGGTTTTGTTTCCTTGAA    |
|            | Probe Sequence  | GTC AAGGAAACAAAACCACTGAC   |
| BART 5     | Location        | 139675-139698              |
|            | Mature Sequence | CAAGGUGAAUAUAGCUGCCCAUCG   |
|            | Primer Sequence | CAAGGTGAATATAGCTGCCCATCGAA |
|            | Probe Sequence  | GCGATGGGCAGCTATATTCACCTTG  |
| BART 5*    | Location        | 139717-139736              |
|            | Mature Sequence | GUGGGCCGCUGUUCACCU         |
|            | Primer Sequence | GTGGGCCGCTGTTCACCTAA       |
|            | Probe Sequence  | GAGGTGAACAGCGGCCAC         |
| BART 16    | Location        | 139795-139817              |
|            | Mature Sequence | UUAGAUAGAGUGGGUGUGUGCUCU   |
|            | Primer Sequence | TTAGATAGAGTGGGTGTGTGCTCTAA |
|            | Probe Sequence  | GAGAGCACACACCCACTCTATCTAA  |
| BART 17-5p | Location        | 139915-139935              |
|            | Mature Sequence | UAAGAGGACGCAGGCAUACAAG     |
|            | Primer Sequence | TAAGAGGACGCAGGCATACAAGAA   |
|            | Probe Sequence  | GCTTGTATGCCTGCGTCCTCTTA    |
| BART 17-3p | Location        | 139953-139975              |
|            | Mature Sequence | UGUAUGCCUGGUGUCCCCUAGU     |
|            | Primer Sequence | TGTATGCCTGGTGTCCCCTTAGTAA  |
|            | Probe Sequence  | GACTAAGGGGACACCAGGCATACA   |
| BART 6-5p  | Location        | 140033-140054              |
|            | Mature Sequence | UAAGGUUGGUCCAAUCCAUAGG     |
|            | Primer Sequence | TAAGGTTGGTCCAATCCATAGGAA   |
|            | Probe Sequence  | GCCTATGGATTGGACCAACCTTA    |

|            |                 |                           |
|------------|-----------------|---------------------------|
| BART 6-3p  | Location        | 140072-140093             |
|            | Mature Sequence | CGGGGAUCGGACUAGCCUUAGA    |
|            | Primer Sequence | CGGGGATCGGACTAGCCTTAGAAA  |
| BART 21-5p | Probe Sequence  | GTCTAAGGCTAGTCCGATCCCCG   |
|            | Location        | 145514-145534             |
|            | Mature Sequence | UCACUAGUGAAGGCAACU AAC    |
| BART 21-3p | Primer Sequence | TCACTAGTGAAGGCAACTAACAA   |
|            | Probe Sequence  | GGTTAGTTGCCTTCACTAGTGA    |
|            | Location        | 145548-145569             |
| BART 18-5p | Mature Sequence | CUAGUUGUGCCCACUGGUGUUU    |
|            | Primer Sequence | CTAGTTGTGCCCACTGGTGT TAAA |
|            | Probe Sequence  | GAAACACCAGTGGGCACA ACTAG  |
| BART 18-3p | Location        | 145962-145983             |
|            | Mature Sequence | UCAAGUUCGCACU UCCUAUACA   |
|            | Primer Sequence | TCAAGTTCGCACTTCTATACAAA   |
| BART 7*    | Probe Sequence  | GTGTATAGGAAGTGCGAACTTGA   |
|            | Location        | 145998-146019             |
|            | Mature Sequence | UAUCGGAAGUUUGGGCUUCGUC    |
| BART 7*    | Primer Sequence | TATCGGAAGTTTGGGCTTCGTCAA  |
|            | Probe Sequence  | GGACGAAGCCCAA ACTTCCGATA  |
|            | Location        | 146439-146460             |
| BART 7     | Mature Sequence | CCUGGACCUUGACUAUGAAACA    |
|            | Primer Sequence | CCTGGACCTTGACTATGAAACAAA  |
|            | Probe Sequence  | GTGTTTCATAGTCAAGGTCCAGG   |
| BART 7     | Location        | 146475-146496             |
|            | Mature Sequence | CAUCAUAGUCCAGUGUCCAGGG    |
|            | Primer Sequence | TCATAGTCCAGTGTCCAGGGAA    |
| BART 8     | Probe Sequence  | GCCCTGGACACTGGACTATGATG   |
|            | Location        | 146772-146793             |
|            | Mature Sequence | UACGGUUUCCUAGAUUGUACAG    |
| BART 8*    | Primer Sequence | TACGGTTTCCTAGATTGTACAGAA  |
|            | Probe Sequence  | GCTGTACAATCTAGGAAACCGTA   |
|            | Location        | 146807-146829             |
| BART 8*    | Mature Sequence | GUCACAAUCUAUGGGGUCGUAGA   |
|            | Primer Sequence | GTCACAATCTATGGGGTCGTAGAAA |
|            | Probe Sequence  | GTCTACGACCCCATAGATTGTGAC  |
| BART 9*    | Location        | 146959-146980             |
|            | Mature Sequence | UACUGGACCCUGAAUUGGAAAC    |
|            | Primer Sequence | TACTGGACCCTGAATTGGAAACAA  |
| BART 9     | Probe Sequence  | GGTTTCCAATTCAGGGTCCAGTA   |
|            | Location        | 146997-147019             |
|            | Mature Sequence | UAACACUUCAUGGGUCCCGUAGU   |
| BART 9     | Primer Sequence | TAACACTTCATGGGTCCCGTAGTAA |
|            | Probe Sequence  | GACTACGGGACCCATGAAGTGTTA  |

|            |                 |                              |
|------------|-----------------|------------------------------|
| BART 22    | Location        | 147203-147225                |
|            | Mature Sequence | UUACAAAGUCAUGGUCUAGUAGU      |
|            | Primer Sequence | CTTACAAAGTCATGGTCTAGTAGTAAAA |
|            | Probe Sequence  | ACTACTAGACCATGACTTTGTAA      |
| BART 10*   | Location        | 147321-147342                |
|            | Mature Sequence | GCCACCUCUUUGGUUCUGUACA       |
|            | Primer Sequence | GCCACCTCTTTGGTTCTGTACAAA     |
|            | Probe Sequence  | GTGTACAGAACCAAAGAGGTGGC      |
| BART 10    | Location        | 147356-147378                |
|            | Mature Sequence | UACAUAAACCAUGGAGUUGGCUGU     |
|            | Primer Sequence | TACATAACCATGGAGTTGGCTGTAA    |
|            | Probe Sequence  | GACAGCCAACTCCATGGTTATGTA     |
| BART 11-5p | Location        | 147537-147560                |
|            | Mature Sequence | UCAGACAGUUUGGUGCGCUAGUUG     |
|            | Primer Sequence | TCAGACAGTTTGGTGGCTAGTTGAA    |
|            | Probe Sequence  | GCAACTAGCGCACCAAACACTGTCTGA  |
| BART 11-3p | Location        | 147575-147595                |
|            | Mature Sequence | ACGCACACCAGGCUGACUGCC        |
|            | Primer Sequence | ACGCACACCAGGCTGACTGCCAA      |
|            | Probe Sequence  | GGGCAGTCAGCCTGGTGTGCGT       |
| BART 12    | Location        | 147936-147957                |
|            | Mature Sequence | UCCUGUGGUGUUUGGUGUGGUU       |
|            | Primer Sequence | TCTGTGGTGTTTGGTGTGGTTAA      |
|            | Probe Sequence  | GAACCACACCAAACACCACAGGA      |
| BART 19-5p | Location        | 148215-148237                |
|            | Mature Sequence | ACAUUCCCCGCAAACAUGACAUG      |
|            | Primer Sequence | TTCCCCGCAAACATGACATGAA       |
|            | Probe Sequence  | GCATGTCATGTTTGCGGGGAATGT     |
| BART 19-3p | Location        | 148254-148274                |
|            | Mature Sequence | UUUUGUUUGCUUGGGAAUGCU        |
|            | Primer Sequence | TTTTGTTTGCTTGGGAATGCTAA      |
|            | Probe Sequence  | GAGCATTCCCAAGCAAACAAAA       |
| BART 20-5p | Location        | 148339-148359                |
|            | Mature Sequence | UAGCAGGCAUGUCUUCAUUCC        |
|            | Primer Sequence | TAGCAGGCATGTCTTCATTCCAA      |
|            | Probe Sequence  | GGGAATGAAGACATGCCTGCTA       |
| BART 20-3p | Location        | 148374-148395                |
|            | Mature Sequence | CAUGAAGGCACAGCCUGUUACC       |
|            | Primer Sequence | CATGAAGGCACAGCCTGTTACCAA     |
|            | Probe Sequence  | GGGTAACAGGCTGTGCCTTCATG      |
| BART 13*   | Location        | 148526-148547                |
|            | Mature Sequence | AACCGGCUCGUGGCUCGUACAG       |
|            | Primer Sequence | AACCGGCTCGTGGCTCGTACAGAA     |
|            | Probe Sequence  | GCTGTACGAGCCACGAGCCGGTT      |

|           |                 |                            |
|-----------|-----------------|----------------------------|
| BART 13   | Location        | 148563-148585              |
|           | Mature Sequence | UGUAACUUGCCAGGGACGGCUGA    |
|           | Primer Sequence | TGTAACCTGCCAGGGACGGCTGAAA  |
|           | Probe Sequence  | GTCAGCCGTCCTGGCAAGTTACA    |
| BART 14*  | Location        | 148744-148765              |
|           | Mature Sequence | UACCCUACGCUGCCGAUUUACA     |
|           | Primer Sequence | TACCCTACGCTGCCGATTTACAAA   |
|           | Probe Sequence  | GTGTAAATCGGCAGCGTAGGGTA    |
| BART 14   | Location        | 148778-148799              |
|           | Mature Sequence | UAAAUGCUGCAGUAGUAGGGAU     |
|           | Primer Sequence | TAAATGCTGCAGTAGTAGGGATAA   |
|           | Probe Sequence  | GATCCCTACTACTGCAGCATTTA    |
| BART 2-5p | Location        | 152747-152768              |
|           | Mature Sequence | UAUUUUCUGCAUUCGCCCUUGC     |
|           | Primer Sequence | TATTTTCTGCATTCGCCCTTGCAA   |
|           | Probe Sequence  | GGCAAGGGCGAATGCAGAAAATA    |
| BART 2-3p | Location        | 152783-152806              |
|           | Mature Sequence | AAGGAGCGAUUUGGAGAAAAUAAA   |
|           | Primer Sequence | AAGGAGCGATTTGGAGAAAATAAAAA |
|           | Probe Sequence  | GTTTATTTTCTCCAATCGCTCCTT   |

Note: The genomic locations of EBV miRNA species refer to the positions in the EBV genome (GenBank accession number AJ507799.2). Sequences of mature miRNA species are taken from Sanger miRNA Registry (<http://microrna.sanger.ac.uk>). Primer sequence indicates specific qRT-PCR primer for each miRNAs and Probe sequence means microarray probe oligo nucleotide sequence designed for each EBV miRNAs.
